# Supplementary material for: Food Liking but Not Wanting Decreases after Controlled Intermittent or Continuous Energy Restriction to ≥5% Weight Loss in Women with Overweight/Obesity
Source: PubMed Central journal article supplement (PMC7827400; doi:10.3390/nu13010182), 2021-01-09
Supplement: nutrients-13-00182-s001.pdf [file nutrients-13-00182-s001.pdf]

# Supplementary materials

Article: Food liking but not wanting decreases after controlled intermittent or continuous energy restriction to  $\geq 5\%$  weight loss in women with overweight/obesity

**Table S1:** List of food used in the LFPQ in this study, **Table S2:** Baseline characteristics of the 30 women with overweight and obesity who reached  $\geq 5\%$ WL, **Table S3:** Changes in food reward during weight loss and follow-up, **Table S4:** Mixed model for liking during weight management, **Table S5:** Mixed model for implicit wanting during weight management

**Table S1:** List of food used in the LFPQ in this study

| Food Categories | High-fat          | Low-fat         |
|-----------------|-------------------|-----------------|
| Savoury         | Cheese            | Boiled potatoes |
|                 | Peanuts           | Pasta in sauce  |
|                 | Crisps            | Rice            |
|                 | Fries             | Bread loaf      |
| Sweet           | Jam bun           | Jelly beans     |
|                 | Milk chocolate    | Popcorn         |
|                 | Blueberry muffins | Marshmallow     |
|                 | Donuts            | Fruits salad    |

**Table S2:** Baseline characteristics of the 30 women with overweight and obesity who reached  $\geq 5\%$ WL

|                                               | CER             | IER             | p-value |
|-----------------------------------------------|-----------------|-----------------|---------|
| <b>Per protocol (<math>\geq 5\%</math>WL)</b> | <b>N = 18</b>   | <b>N = 12</b>   |         |
| Age (years)                                   | 35 $\pm$ 9      | 34 $\pm$ 10     | 0.80    |
| Body mass (kg)                                | 79.2 $\pm$ 10.4 | 81.1 $\pm$ 12.2 | 0.64    |
| Height (cm)                                   | 1.65 $\pm$ 0.8  | 1.67 $\pm$ 0.9  | 0.58    |
| BMI (kg/m <sup>2</sup> )                      | 29.1 $\pm$ 2.4  | 29.1 $\pm$ 2.5  | 0.95    |
| Fat mass (kg)                                 | 32.5 $\pm$ 8.3  | 34.0 $\pm$ 7.2  | 0.60    |
| Fat-free mass (kg)                            | 46.7 $\pm$ 5.5  | 47.1 $\pm$ 6.6  | 0.85    |
| Body fat (%)                                  | 40.6 $\pm$ 6.2  | 41.7 $\pm$ 4.1  | 0.60    |
| RMR (kcal/day)                                | 1456 $\pm$ 214  | 1441 $\pm$ 201  | 0.85    |

Means  $\pm$  SD; BMI: body mass index; CER: continuous energy restriction; IER: intermittent energy restriction; RMR: resting metabolic rate; WL: weight loss. P-values are results of independent sample t-test

**Table S3:** Changes in food reward during weight loss and follow-up

|             | Baseline (N = 29) | Post-WL (N = 29) | Follow-up (N = 13) | Changes WL (N = 29) | Change Follow-up (N = 13) |                |
|-------------|-------------------|------------------|--------------------|---------------------|---------------------------|----------------|
| Liking (mm) | HFSA              | 63.1 $\pm$ 17.6  | 55.9 $\pm$ 21.2    | 64.4 $\pm$ 12.1     | -7.1 $\pm$ 15.4           | 7.1 $\pm$ 21.7 |
|             | LFSA              | 53.2 $\pm$ 20.4  | 46.0 $\pm$ 20.9    | 52.7 $\pm$ 19.5     | -7.2 $\pm$ 15.1           | 0.3 $\pm$ 13.4 |
|             | HFSW              | 55.8 $\pm$ 25.7  | 48.3 $\pm$ 21.8    | 53.1 $\pm$ 23.0     | -7.5 $\pm$ 17.6           | 8.1 $\pm$ 13.3 |
|             | LFSW              | 57.0 $\pm$ 19.1  | 50.9 $\pm$ 13.9    | 54.9 $\pm$ 17.1     | -6.1 $\pm$ 16.8           | 6.4 $\pm$ 17.2 |
|             | HFSA              | 18.9 $\pm$ 22.1  | 18.4 $\pm$ 22.0    | 26.9 $\pm$ 19.8     | -0.5 $\pm$ 20.6           | 4.3 $\pm$ 6.8  |

|                      |      |             |             |             |             |             |
|----------------------|------|-------------|-------------|-------------|-------------|-------------|
| Wanting<br>(no unit) | LFSA | -2.6 ± 27.5 | -3.7 ± 23.0 | 3.8 ± 20.0  | -1.1 ± 21.1 | -3.9 ± 11.3 |
|                      | HFSW | -7.1 ± 29.1 | -9.6 ± 25.5 | -13.5 ± 2   | -2.5 ± 20.0 | 2.0 ± 12.5  |
|                      | LFSW | -9.2 ± 27.2 | -5.0 ± 25.9 | -17.2 ± 6.1 | 4.1 ± 18.4  | -2.4 ± 5.9  |

Mean ± SD; HFSW: high-fat-sweet, HFSA: high-fat-savoury, LFSW: low-fat-sweet, LFSA: low-fat-savoury; “Changes-WL” represents changes during WL (post-WL – baseline); “Changes Follow-up” represents changes during follow-up (Follow-up – Post-WL). N = 13 for follow-up as LFPQ data were missing from one participant.

**Table S4:** Mixed model for liking during weight management

| <b>Model for HFSA:</b>          |                                                                                             | <b>HFSA_PreLunch ~ SV + Condition_5percent + (1   PPID)</b> |           |                |           |                |                 |                  |
|---------------------------------|---------------------------------------------------------------------------------------------|-------------------------------------------------------------|-----------|----------------|-----------|----------------|-----------------|------------------|
| <b>Fixed effect</b>             | <i>Variables</i>                                                                            | <i>Estimate</i>                                             | <i>SE</i> | <i>t-value</i> | <i>df</i> | <i>p-value</i> | <i>CI_lower</i> | <i>CI_higher</i> |
|                                 | (Intercept)                                                                                 | 59.49                                                       | 3.95      | 15.06          | 44.21     | <.001          | 51.58           | 67.41            |
|                                 | Post-WL                                                                                     | -7.12                                                       | 3.25      | -2.19          | 42.78     | 0.034          | -13.64          | -0.60            |
|                                 | Follow-up                                                                                   | 1.64                                                        | 4.39      | 0.37           | 46.98     | 0.711          | -7.11           | 10.5             |
|                                 | IER                                                                                         | 8.65                                                        | 5.52      | 1.56           | 30.46     | 0.128          | -2.56           | 19.82            |
| <b>Random effect</b>            |                                                                                             | <i>Variance</i>                                             | <i>SD</i> |                |           |                |                 |                  |
|                                 | PPID                                                                                        | 147.5                                                       | 12.15     |                |           |                |                 |                  |
|                                 | Residuals                                                                                   | 153.2                                                       | 12.38     |                |           |                |                 |                  |
|                                 | Number of obs                                                                               | Groups: 71; PPID: 29                                        |           |                |           |                |                 |                  |
| <b>Goodness of fit measures</b> | Conditional R <sup>2</sup> : 0.537; Marginal R <sup>2</sup> : 0.091; AIC: 605.2; BIC:619.2  |                                                             |           |                |           |                |                 |                  |
| <b>Model for LFSA</b>           |                                                                                             | <b>LFSA_PreLunch ~ SV + Condition_5percent + (1   PPID)</b> |           |                |           |                |                 |                  |
| <b>Fixed effect</b>             | <i>Variables</i>                                                                            | <i>Estimate</i>                                             | <i>SE</i> | <i>t-value</i> | <i>df</i> | <i>p-value</i> | <i>CI_lower</i> | <i>CI_higher</i> |
|                                 | (Intercept)                                                                                 | 50.87                                                       | 4.60      | 11.07          | 35.49     | <.001          | 41.62           | 60.14            |
|                                 | Post-WL                                                                                     | -7.20                                                       | 2.62      | -2.75          | 42.26     | 0.009          | -12.47          | -1.95            |
|                                 | Follow-up                                                                                   | -4.19                                                       | 3.60      | -1.16          | 44.08     | 0.251          | -11.35          | 3.12             |
|                                 | IER                                                                                         | 5.62                                                        | 6.81      | 0.82           | 29.59     | 0.416          | -8.19           | 19.41            |
| <b>Random effect</b>            |                                                                                             | <i>Variance</i>                                             | <i>SD</i> |                |           |                |                 |                  |
|                                 | PPID                                                                                        | 282.29                                                      | 16.80     |                |           |                |                 |                  |
|                                 | Residuals                                                                                   | 99.81                                                       | 9.99      |                |           |                |                 |                  |
|                                 | Number of obs                                                                               | Groups: 71; PPID: 29                                        |           |                |           |                |                 |                  |
| <b>Goodness of fit measures</b> | Conditional R <sup>2</sup> : 0.751; Marginal R <sup>2</sup> : 0.046; AIC: 599.9; BIC: 613.5 |                                                             |           |                |           |                |                 |                  |
| <b>Model for HFSW</b>           |                                                                                             | <b>HFSW_PreLunch ~ SV + Condition_5percent + (1   PPID)</b> |           |                |           |                |                 |                  |
| <b>Fixed effect</b>             | <i>Variables</i>                                                                            | <i>Estimate</i>                                             | <i>SE</i> | <i>t-value</i> | <i>df</i> | <i>p-value</i> | <i>CI_lower</i> | <i>CI_higher</i> |
|                                 | (Intercept)                                                                                 | 53.20                                                       | 5.37      | 9.91           | 35.47     | <.001          | 42.40           | 64.04            |
|                                 | Post-WL                                                                                     | -7.48                                                       | 3.15      | -2.37          | 41.85     | 0.022          | -13.81          | -1.16            |
|                                 | Follow-up                                                                                   | -2.07                                                       | 4.32      | -0.48          | 43.80     | 0.635          | -10.72          | 6.60             |
|                                 | IER                                                                                         | 6.21                                                        | 7.94      | 0.78           | 29.19     | 0.440          | -9.94           | 22.23            |
| <b>Random effect</b>            |                                                                                             | <i>Variance</i>                                             | <i>SD</i> |                |           |                |                 |                  |
|                                 | PPID                                                                                        | 379.3                                                       | 19.47     |                |           |                |                 |                  |
|                                 | Residuals                                                                                   | 144.2                                                       | 12.01     |                |           |                |                 |                  |
|                                 | Number of obs                                                                               | Groups: 71; PPID: 29                                        |           |                |           |                |                 |                  |

SV: Study Visits with 3 levels “Baseline” [ref], “Post-WL” and “Follow-up”; Condition\_5percent stands for the diets conditions either IER or CER [ref]; (SE): standard error (SD): standard deviation; (df): degree of freedom

| Goodness of fit measures |             | Conditional R <sup>2</sup> : 0.735; Marginal R <sup>2</sup> : 0.038; AIC: 624.2; BIC: 637.8 |       |         |       |         |          |           |  |
|--------------------------|-------------|---------------------------------------------------------------------------------------------|-------|---------|-------|---------|----------|-----------|--|
| Model for LFSW           |             | LFSW_PreLunch ~ SV + Condition_5percent + (1   PPID)                                        |       |         |       |         |          |           |  |
| Fixed effect             | Variables   | Estimate                                                                                    | SE    | t-value | df    | p-value | CI_lower | CI_higher |  |
|                          | (Intercept) | 55.30                                                                                       | 3.73  | 14.82   | 41.93 | <.001   | 47.83    | 62.81     |  |
|                          | Post-WL     | -6.12                                                                                       | 2.99  | -2.05   | 41.41 | 0.047   | -12.11   | -0.13     |  |
|                          | Follow-up   | -0.60                                                                                       | 4.04  | -0.15   | 45.40 | 0.883   | -8.7     | 7.48      |  |
|                          | IER         | 4.14                                                                                        | 5.25  | 0.79    | 29.04 | 0.437   | -6.56    | 14.74     |  |
| Random effect            |             | Variance                                                                                    | SD    |         |       |         |          |           |  |
|                          | PPID        | 137.2                                                                                       | 11.71 |         |       |         |          |           |  |
|                          | Residuals   | 129.3                                                                                       | 11.37 |         |       |         |          |           |  |
| Number of obs            |             | Groups: 71; PPID: 29                                                                        |       |         |       |         |          |           |  |

| Goodness of fit measures |  | Conditional R <sup>2</sup> : 0.536; Marginal R <sup>2</sup> : 0.044; AIC: 595.5; BIC: 609.1 |  |  |  |  |  |  |  |
|--------------------------|--|---------------------------------------------------------------------------------------------|--|--|--|--|--|--|--|
|--------------------------|--|---------------------------------------------------------------------------------------------|--|--|--|--|--|--|--|

**Table S5: Mixed model for implicit wanting during weight management**

| Model for HFSA |             | HFSA_PreLunch ~ SV + Condition_5percent + (1   PPID) |       |         |       |         |          |           |  |
|----------------|-------------|------------------------------------------------------|-------|---------|-------|---------|----------|-----------|--|
| Fixed effect   | Variables   | Estimate                                             | SE    | t-value | df    | p-value | CI_lower | CI_higher |  |
|                | (Intercept) | 18.99                                                | 4.95  | 3.84    | 37.20 | <.001   | 9.01     | 28.93     |  |
|                | Post-WL     | -0.50                                                | 3.19  | -0.16   | 42.02 | 0.876   | -6.90    | 5.90      |  |
|                | Follow-up   | 5.40                                                 | 4.36  | 1.24    | 44.42 | 0.222   | -3.29    | 14.20     |  |
|                | IER         | -0.22                                                | 7.23  | -0.03   | 29.44 | 0.973   | -14.82   | 14.49     |  |
| Random effect  |             | Variance                                             | SD    |         |       |         |          |           |  |
|                | PPID        | 302.7                                                | 17.40 |         |       |         |          |           |  |
|                | Residuals   | 147.5                                                | 12.15 |         |       |         |          |           |  |
| Number of obs  |             | Groups: 71; PPID: 29                                 |       |         |       |         |          |           |  |

| Goodness of fit measures |  | Conditional R <sup>2</sup> : 0.676; Marginal R <sup>2</sup> : 0.011; AIC: 619.7; BIC: 633.3 |  |  |  |  |  |  |  |
|--------------------------|--|---------------------------------------------------------------------------------------------|--|--|--|--|--|--|--|
|--------------------------|--|---------------------------------------------------------------------------------------------|--|--|--|--|--|--|--|

| Model for LFSA |             | LFSA_PreLunch ~ SV + Condition_5percent + (1   PPID) |       |         |       |         |          |           |  |
|----------------|-------------|------------------------------------------------------|-------|---------|-------|---------|----------|-----------|--|
| Fixed effect   | Variables   | Estimate                                             | SE    | t-value | df    | p-value | CI_lower | CI_higher |  |
|                | (Intercept) | -1.13                                                | 5.68  | -0.20   | 36.02 | 0.843   | -12.58   | 10.32     |  |
|                | Post-WL     | -1.11                                                | 3.52  | -0.31   | 41.59 | 0.755   | -8.16    | 5.95      |  |
|                | Follow-up   | -1.88                                                | 4.82  | -0.39   | 43.78 | 0.699   | -11.44   | 7.99      |  |
|                | IER         | -3.58                                                | 8.35  | -0.43   | 28.97 | 0.671   | -20.51   | 13.34     |  |
| Random effect  |             | Variance                                             | SD    |         |       |         |          |           |  |
|                | PPID        | 411.1                                                | 20.27 |         |       |         |          |           |  |
|                | Residuals   | 179.4                                                | 13.40 |         |       |         |          |           |  |
| Number of obs  |             | Groups: 71; PPID: 29                                 |       |         |       |         |          |           |  |

| Goodness of fit measures |  | Conditional R <sup>2</sup> : 0.698; Marginal R <sup>2</sup> : 0.006; AIC: 636.3; BIC: 649.9 |  |  |  |  |  |  |  |
|--------------------------|--|---------------------------------------------------------------------------------------------|--|--|--|--|--|--|--|
|--------------------------|--|---------------------------------------------------------------------------------------------|--|--|--|--|--|--|--|

| Model for HFSW |  | HFSW_PreLunch ~ SV + Condition_5percent + (1   PPID) |  |  |  |  |  |  |  |
|----------------|--|------------------------------------------------------|--|--|--|--|--|--|--|
|----------------|--|------------------------------------------------------|--|--|--|--|--|--|--|

| <b>Fixed effect</b>             | <i>Variables</i>                                                                            | <i>Estimate</i>                                      | <i>SE</i> | <i>t-value</i> | <i>df</i> | <i>p-value</i> | <i>CI_lower</i> | <i>CI_higher</i> |
|---------------------------------|---------------------------------------------------------------------------------------------|------------------------------------------------------|-----------|----------------|-----------|----------------|-----------------|------------------|
|                                 | (Intercept)                                                                                 | -8.31                                                | 6.30      | -1.32          | 33.61     | 0.196          | -21.02          | 4.42             |
|                                 | Post-WL                                                                                     | -2.52                                                | 3.35      | -0.75          | 41.31     | 0.456          | -9.25           | 4.20             |
|                                 | Follow-up                                                                                   | -0.51                                                | 4.61      | -0.11          | 42.9      | 0.913          | -9.83           | 8.67             |
|                                 | IER                                                                                         | 2.92                                                 | 9.40      | 0.31           | 28.6      | 0.759          | -16.20          | 21.94            |
| <b>Random effect</b>            |                                                                                             | <i>Variance</i>                                      | <i>SD</i> |                |           |                |                 |                  |
|                                 | PPID                                                                                        | 549.9                                                | 23.45     |                |           |                |                 |                  |
|                                 | Residuals                                                                                   | 163.0                                                | 12.77     |                |           |                |                 |                  |
| Number of obs                   |                                                                                             | Groups: 71; PPID: 29                                 |           |                |           |                |                 |                  |
| <b>Goodness of fit measures</b> | Conditional R <sup>2</sup> : 0.772; Marginal R <sup>2</sup> : 0.005; AIC: 639.2; BIC: 652.8 |                                                      |           |                |           |                |                 |                  |
| <b>Model for LFSW</b>           |                                                                                             | LFSW_PreLunch ~ SV + Condition_5percent + (1   PPID) |           |                |           |                |                 |                  |
| <b>Fixed effect</b>             | <i>Variables</i>                                                                            | <i>Estimate</i>                                      | <i>SE</i> | <i>t-value</i> | <i>df</i> | <i>p-value</i> | <i>CI_lower</i> | <i>CI_higher</i> |
|                                 | (Intercept)                                                                                 | -9.49                                                | 6.00      | -1.58          | 33.90     | 0.123          | -21.61          | 2.61             |
|                                 | Post-WL                                                                                     | 4.13                                                 | 2.97      | 1.39           | 42.35     | 0.171          | -1.82           | 10.08            |
|                                 | Follow-up                                                                                   | -2.22                                                | 4.08      | -0.54          | 43.68     | 0.589          | -10.49          | 5.91             |
|                                 | IER                                                                                         | 0.76                                                 | 9.01      | 0.08           | 29.60     | 0.933          | -17.48          | 19.02            |
| <b>Random effect</b>            |                                                                                             | <i>Variance</i>                                      | <i>SD</i> |                |           |                |                 |                  |
|                                 | PPID                                                                                        | 514.6                                                | 22.68     |                |           |                |                 |                  |
|                                 | Residuals                                                                                   | 127.8                                                | 11.30     |                |           |                |                 |                  |
| Number of obs                   |                                                                                             | Groups: 71; PPID: 29                                 |           |                |           |                |                 |                  |
| <b>Goodness of fit measures</b> | Conditional R <sup>2</sup> : 0.803; Marginal R <sup>2</sup> : 0.010; AIC: 626.5; BIC: 640.1 |                                                      |           |                |           |                |                 |                  |

SV: Study Visits with 3 levels "Baseline" [ref], "Post-WL" and "Follow-up"; Condition\_5percent stands for the diets conditions either IER or CER [ref]; (SE): standard error (SD): standard deviation; (df): degree of freedom
